# Supplementary material for: Broad host range vectors for expression of proteins with (Twin-) Strep-tag, His-tag and engineered, export optimized yellow fluorescent protein
Source: PubMed Central journal article supplement (PMC3680311; doi:10.1186/1475-2859-12-49), 2013-05-20
Supplement: 1475-2859-12-49-S1.pdf [file 1475-2859-12-49-S1.pdf]

## **Additional file 1:**

### **Broad host range vectors for expression of proteins with (Twin-) Strep-tag, HIS-tag and engineered, export optimized yellow fluorescent protein**

Thorben Dammeyer<sup>§,1,2</sup>, Kenneth N. Timmis<sup>2,3</sup> and Philip Tinnefeld<sup>1</sup>

<sup>1</sup>Institut für Physikalische und Theoretische Chemie, NanoBioSciences, Technische Universität Braunschweig, Hans Sommer Str. 10, 38106 Braunschweig, Germany

<sup>2</sup>Environmental Microbiology Laboratory, Helmholtz Centre for Infection Research, Inhoffenstr. 7, 38124 Braunschweig, Germany

<sup>3</sup>Institut für Mikrobiologie, Technische Universität Braunschweig, Spielmannstr. 7, 38106 Braunschweig, Germany

<sup>§</sup>Corresponding author

#### **Address correspondence to:**

Dr. Thorben Dammeyer  
NanoBioSciences  
Institut für Physikalische und Theoretische Chemie  
Hans Sommer Str. 10  
38106 Braunschweig, Germany  
Email: [T.Dammeyer@tu-braunschweig.de](mailto:T.Dammeyer@tu-braunschweig.de)

### Supplemental Information 1: DNA sequences of customized, synthetic vector multiple cloning sites.

Restriction sites used for vector construction are in bold; ATG and Stopp codons in italic; the RBS is underlined; Strep-tagII/Twin-Strep-tag is marked in orange; HIS6-tag in green and pelB-sequences in violet. MCS *EcoRI* site is in red. Further information on the used plasmid backbones pSEVA424 (GeneBank # KC847293) and pSEVA224 (GenBank # KC847291) is available on <http://seva.cnb.csic.es>.

#### MCSI

cgtagc**caattg**tttaaaggagatatatacaaatggctagct**tggagccaccgcagttcgaaaa**  
aggcgccgagaccgcggtccc**gaattc**gagctcggtagccggggatccctcgaggtcgacct  
gcagggggaccatggtctcaggcctgagaggatcg**catcaccatcaccAtcac**taatttaa  
**aagctt**gtc

#### MCSII

cgtagc**caattg**gaaggagatatatacaaatggctagcgct**tggagccaccgcagttcgagaa**  
agggtggagggtt**ccggaggtggatcgggaggttcggcgtggagccaccgcagttcgaaaaa**g  
gcgccgagaccgcggtccc**gaattc**gagctcggtagccggggatccctcgaggtcgacctgc  
agggggaccatggtctcaggcctgagaggatcg**catcaccatcaccatcac**taa**aagctt**gt  
c

#### MCSIII

cgtagc**caattg**ttaactttaagaaggagatatatacatatggatcc**gaattc**gagctccgtc  
gactctagagcggccgactcgagagcgct**tggagccaccgcagttcgagaaagggtggagg**  
tt**ccggaggtggatcgggaggtggatcgtggagccaccgcagttcgaaaaa**taatgatgaa  
**agctt**gtc

#### MCSIV

cgtagc**caattg**gaaggagatatatacaaatgaagtac**ctgctgccgaccgcccggcct**  
gctgctgctggccgcccagccggccatggccagcgct**tggagccaccgcagttcgagaaag**  
gtggagggtt**ccggaggtggatcgggaggttcggcgtggagccaccgcagttcgaaaaa**ggc  
Gccgagaccgcggtccc**gaattc**gagctcggtagccggggatccctcgaggtcgacctgcag  
ggggaccatggtctcaggcctgagaggatcg**catcaccatcaccatcac**taa**aagctt**gtc

#### MCSV

cgtagc**caattg**ttaactttaagaaggagatatatacatatgaagtac**ctgctgccgaccgccc**  
ccgcccggcctgctgctgctggccgcccagccggccatggccgatcc**gaattc**gagctccgtcgactctaga  
gcccggcactcgagagcgct**tggagccaccgcagttcgagaaagggtggagggttccggaggtggatc**  
gggaggtt**ccggcgtggagccaccgcagttcgaaaaa**taatgatgaa**aagctt**gtc

**Supplemental Information 2: Translated amino acid sequence of plasmids pTD\_C-eYFP-TwinStrep and pTD\_C-sfYFP-TwinStrep.** Relevant amino acid residue mutations are colored and numbered relative to the translation start MVSK... (F65L ; S176G; F100S, M154T, V164A; S29R; Y40N; N106T; Y146F; I172V; A207K).

eYFP

MDPNSIVSKGEELFTGVVPILVELDGDVNGHKFSVSGEGEGDATYGKLTLLKFICTTGKLPVP  
WPTLVTTFGYGLQCFARYPDHMKQHDFFKSAMPEGYVQERTIFFKDDGNYKTRAEVKFEGDT  
LVNRIELKGIDFKEDGNILGHKLEYNNSHNVIIMADKQKNGIKVNFKIRHNIEDGSVQLAD  
HYQQNTPIGDGPVLLPDNHLYSYQSKLSKDPNEKRDHMLLEFVTAAGITLGMDELYKSRAA  
ALESAWSHPQFEKGGGSGGGSGGGSSWSHPQFEK

super-folder YFP

MDPNSVSKGEELFTGVVPILVELDGDVNGHKFRVSGEGEGDATNGKLTLLKFICTTGKLPVPW  
PTLVTTLGYGLQCFARYPDHMKQHDFFKSAMPEGYVQERTISFKDDGTYKTRAEVKFEGDTL  
VNRIELKGIDFKEDGNILGHKLEYNFNNSHNVIITADKQKNGIKANFKIRHNVEDGGVQLADH  
YQQNTPIGDGPVLLPDNHLYSYQSKLSKDPNEKRDHMLLEFVTAAGITLGMDELYKSRAAA  
LESAWSHPQFEKGGGSGGGSGGGSSWSHPQFEK

**Supplemental Information 3: Coding synthetic DNA-sequences from plasmids pTD\_C-eYFP-TwinStrep and pTD\_C-sfYFP-TwinStrep.**

eYFP-TwinStrep (% C+G = 49.88)

atggatccgaattcgatcgtttctaaaggtgaagaactgttcaccgggtgttgttccgatcct  
gggtgaaactggacgggtgacgttaacgggtcacaatttctctgtttctggtgaaggtgaaggtg  
acgctacctacggtaaactgacctgaaattcatctgcaccaccggtaaactgccggttccg  
tggccgaccctggttaccaccttcggttacggctctgcagtgttcgctcgttaccggacca  
catgaaacagcagcacttcttcaaattctgctatgccggaaggttacgttcaggaacgtacca  
tcttcttcaaagacgacggtaactacaaaaccgtgctgaagttaaattcgaaggtgacacc  
ctggttaaccgtatcgaactgaaaggtatcgacttcaaagaagacggtaacatcctgggtca  
caactggaatacaactacaactctcacaacgtttacatcatggctgacaaacagaaaaacg  
gtatcaaagttaacttcaaatccgtcacaacatcgaagacggttctgttcagctggctgac  
cactaccagcagaacaccccgatcgggtgacgggtccggttctgctgccggacaaccactacct  
gtcttaccagtctaaactgtctaaagaccggaacgaaaaacgtgaccacatggttctgctgg  
aatttggtaccgctgctgggtatcacctgggtatggacgaactgtacaaatctagagcggcc  
gcactcgagagcgcttgagccacccgcagttcgagaaaggtggaggttccggaggtggatc  
gggaggtggatcgtggagccacccgcagttcgaaaaa

sfYFP-TwinStrep (% C+G = 60.78)

atggatccgaattcgggtgtcgaagggcgaagaactgttcaccggcgtgggtgccgatcctggt  
ggaactggacggcgacgtgaacggccacaagttccgcgtgtcggggaagggcgaagggcgacg  
ccaccaacggcaagctgacctgaagttcatctgcaccaccggcaagctgccggtgccgtgg  
ccgacctgggtgaccacctgggctacggcctgcagtgcttcgcccgtaccggaccacat  
gaagcagcagcacttcttcaagtcggccatgccggaaggtacgtgcaggaacgcaccatct  
cgttcaaggacgacggcacctacaagaccgcgccgaagtgaagttcgaaggcgacacctg  
gtgaaccgcatcgaactgaagggcatcgacttcaaggaagacggcaacatcctgggcccaca  
gctggaatacaacttcaactcgcacacgtgtacatcacccgccgacaagcagaagaacggca  
tcaaggccaacttcaagatccgccacaacgtggaagacggcggcggtgcagctggccgaccac  
taccagcagaacaccccgatcggcgacggcccgggtgctgctgccggacaaccactacctgct  
gtaccagtcgaagctgtcgaaggacccgaacgaaaagcgcgaccacatggtgctgctggaat  
ttgtgaccgcccgccggcatcacctgggcatggacgaactgtacaagtctagagcggccgca  
ctcgagagcgcttgagccacccgcagttcgagaaaggtggaggttccggaggtggatcggg  
aggtggatcgtggagccacccgcagttcgaaaaa

**Supplemental Table:**

**Table S1: Plasmids and oligonucleotides used to construct expression vectors for *P.putida* KT2440 ORFs of different functional categories.** Locus tag numbers from the Pseudomonas genome database and gene names if available with forward and reverse PCR-primer-pairs are given. The respective plasmids and restriction sites *EcoRI/BamHI/HindIII* used for cloning are underlined.

| Locus tag (gene) | Plasmid        | Oligonucleotide                                                                                    |
|------------------|----------------|----------------------------------------------------------------------------------------------------|
| PP_0479 (rpoA)   | pTD-NStrepHis  | 5'-c <u>gaattc</u> g ATGCAGATTTTCGGTAAATG-3'<br>5'-gcg <u>aagctt</u> TCAGGCGGTCGCCTTGTCG-3'        |
| PP_0479 (rpoA)   | pTD-CTwinStrep | 5'-c <u>gaattc</u> g ATC CAGATTTTCGGTAAATGAGTTC-3'<br>5'-gcg TCTAGA GGCGGTCGCCTTGTCGCTTTTCTTAAG-3' |
| PP_2308          | pTD-NStrepHis  | 5'-c <u>gaattc</u> g ATGACTTTCAACCAACTGCTCG-3'<br>5'-gcg <u>aagctt</u> TCAGGCGAAAACGGTGACGGTC-3'   |
| PP_2308          | pTD-CTwinStrep | 5'-c <u>gaattc</u> ATGACTTTCAACCAACTGCTC-3'<br>5'-gcg <u>tctaga</u> GGCGAAAACGGTGACGGTC-3'         |
| PP_5048 (ntrC)   | pTD-CTwinStrep | 5'-c <u>gaattc</u> g ATcAGCCGAAGTGAAACCGTA-3'<br>5'-gcg <u>tctaga</u> GTGGTCATCACCTTCCTCATC-3'     |
| PP_0952 (rpoN)   | pTD-NStrepHis  | 5'-c <u>gaattc</u> g ATGAAACCATCGCTCGTCC-3'<br>5'-gcg <u>aagctt</u> CTACATCAGTCGCTTGCGTTC-3'       |
| PP_1623 (rpoS)   | pTD-NStrepHis  | 5'-c <u>gaattc</u> g ATGGCTCTCAGTAAAGAAG-3'<br>5'-gcg <u>aagctt</u> CTAAGGGAACAATGACTCGCTG-3'      |
| PP_1656 (relA)   | pTD-NStrepHis  | 5'-c <u>gaattc</u> g ATGGTACAGGTGAGAGTGCAC-3'<br>5'-gcg <u>aagctt</u> TCAAGGGGTACGATTACGC-3'       |
| PP_3285 (phaM)   | pTD-CTwinStrep | 5'-c <u>gaattc</u> g ATcCCTTGCTATCGACTGGAC-3'<br>5'-gcg <u>tctaga</u> TGCGCTTGCCTGGCCCTTGG-3'      |
| PP_5003 (phaA)   | pTD-NStrepHis  | 5'-cagggatcccatATGAGTAACAAGAACAACGATGAGCTAC-3'<br>5'-gcg <u>aagctt</u> TCAACGCTCGTGAACGTAGGTG-3'   |
| PP_5005 (phaC)   | pTD-NStrepHis  | 5'-cagggatcccatATGACAGACAAACCGGCCAAAGGATCG-3'<br>5'-gcg <u>aagctt</u> TCATCGGGTCAGCACGTAGGTG-3'    |
| PP_4187 (lpdG)   | pTD-NStrepHis  | 5'-c <u>gaattc</u> g ATCACCCAGAAATTCGACGTAG-3'<br>5'-gcg <u>aagctt</u> TTAACGCTTCTTACGGTTGG-3'     |

Supplemental Figures:

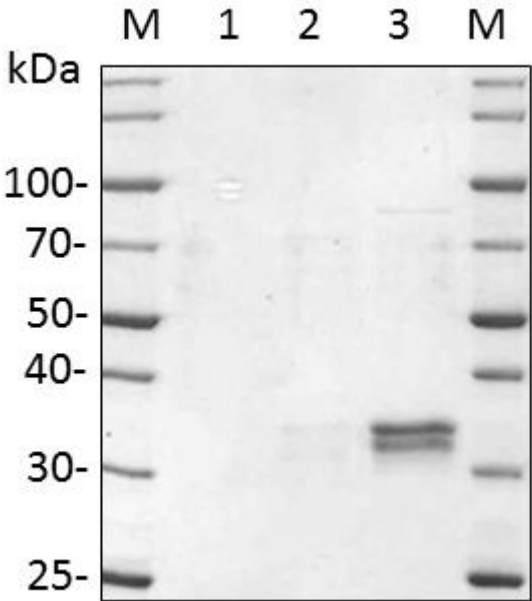

**Figure S1: SDS-PAGE of single step-affinity purified eYFP-TwinStrep and sfYFP-TwinStrep.** SDS-PAGE of single step-affinity purified eYFP-TwinStrep (2) (from plasmid pTDpelB-C\_eYFPTwinStrep) sfYFP-TwinStrep (3) (from plasmid pTDpelB-C\_sfYFPTwinStrep) and a similar treated control strain without plasmid (1) from a periplasmic extraction experiment from *P.putida* KT2440. No significant eYFP protein levels can be seen in 2. The lower band in 3 indicates successful production and export of sfYFP. M=PageRuler Unstained Broad Range Protein Ladder (Thermo).

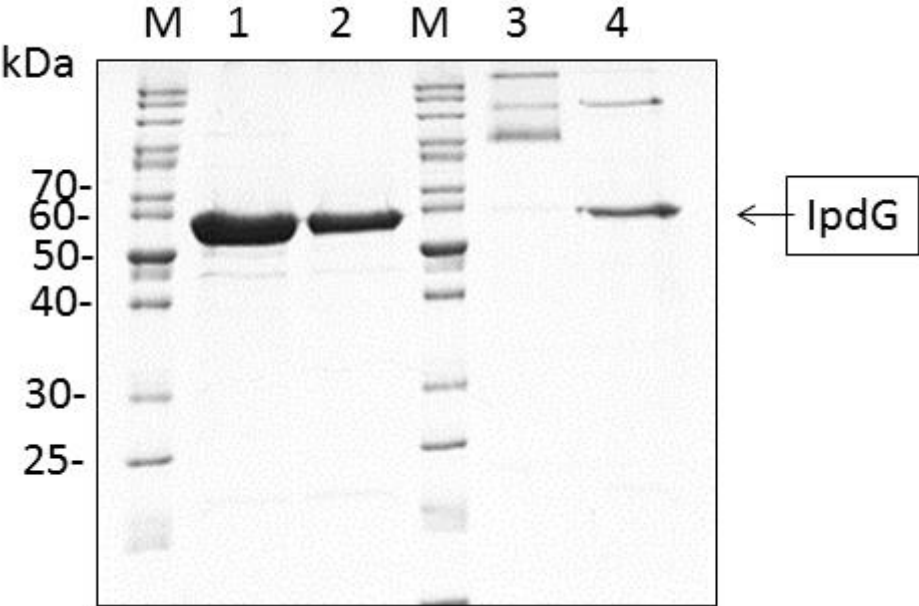

**Figure S2: Expression of Strep-PP\_4187 (IpdG) in *P.putida* KT2440 and *in vivo* formaldehyd crosslinking.** Coomassie stained SDS-PAGE of single step-affinity purified Strep-PP\_4187 from plasmid pTD-NStrepHis elution fraction 3 and 4 (1,2) and single step-affinity purification following *in vivo* fromaldehyde crosslinking (3) and reversed crosslinking after 20 min at 95°C in SDS-sample buffer (4). M= PageRuler Unstained Protein Ladder (Thermo).

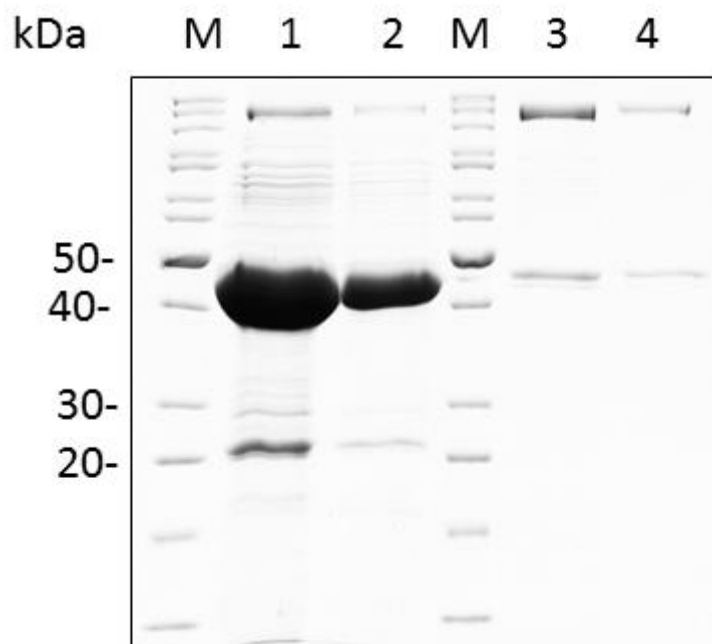

**Figure S3: Coomassie stained SDS-PAGE of induced and uninduced cultures of RpoA-TwinStrep from plasmid pTD-CTwinStrep in *P.putida* KT2440.** Elution fractions 3+4 after one step purification on Strep-Tactin Superflow of IPTG induced (1, 2) and uninduced (3, 4) cultures. M= PageRuler Unstained Protein Ladder (Thermo).

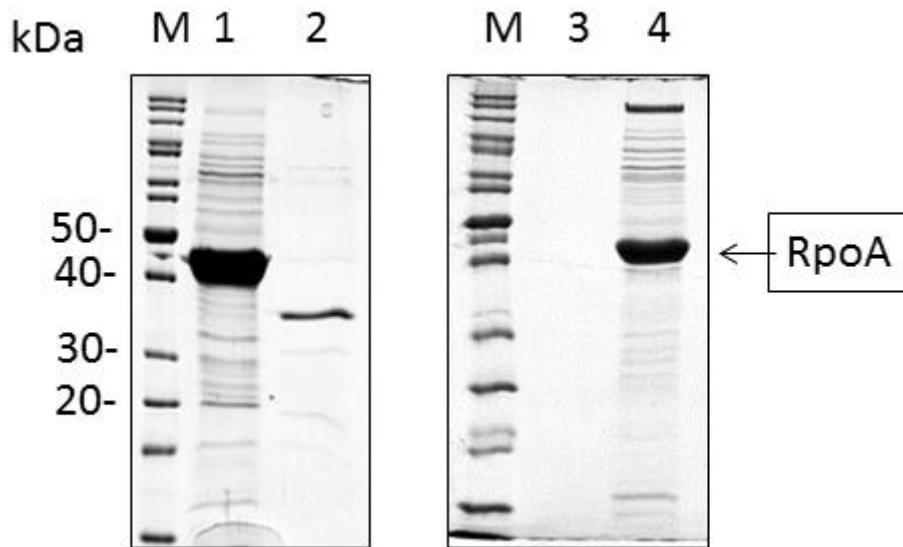

**Figure S4: Expression of Strep-RpoA (from pTD-NStrepHis) and RpoA-Twin-Strep from pTD-CTwinStrep in *P.putida* KT2440.** Coomassie stained SDS-PAGE after expression and single-step purification of Strep-tagII-RpoA (1) and RpoA-Twin-Strep-tag (4) in comparison to identically treated cultures with the empty plasmid (2, 3). Co-purification experiments with less stringent washing. M= PageRuler Unstained Protein Ladder (Thermo). *Strep*-tag II: SA-WSHPQFEK TwinStrep-tag: SA-WSHPQFEK(GGS)2GGSWSHPQFEK.

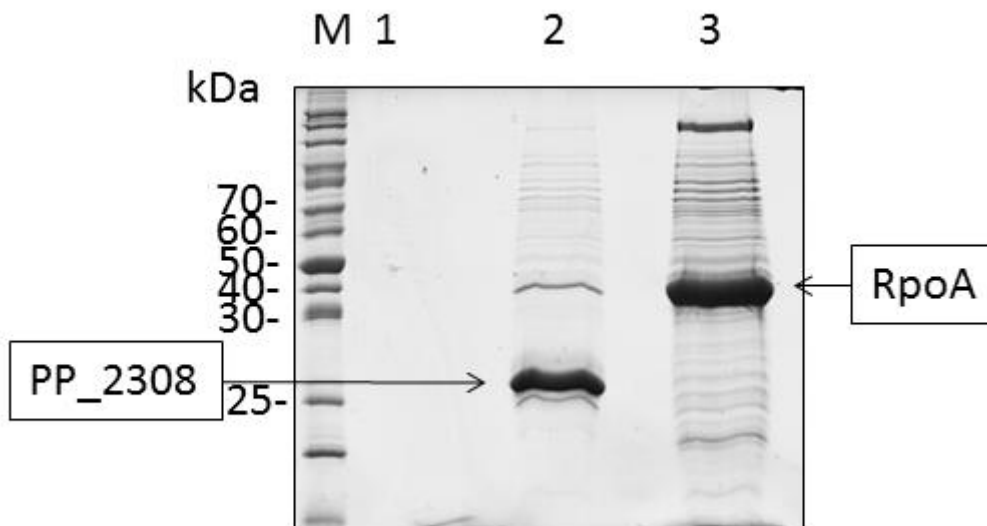

**Figure S5: SDS-PAGE of single step-affinity purified PP\_2308 and RpoA.** Coomassie stained SDS-PAGE of single step-affinity purified PP\_2308-TwinStrep (2) and RpoA-TwinStrep (3) from plasmid pTD-CTwinStrep empty plasmid control (1). Co-purification experiments with low expression and less stringent washing. M= PageRuler Unstained Protein Ladder (Thermo).



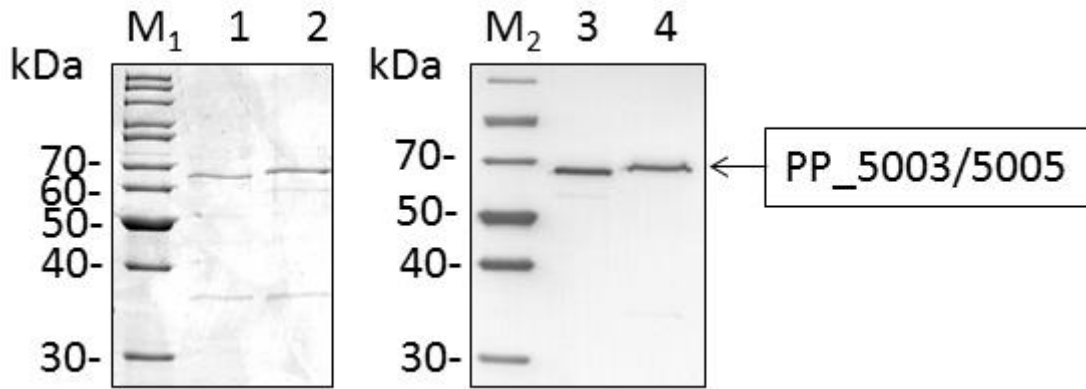

**Figure S6: SDS-PAGE and Western-Blot detection of Strep-PP\_5003 and Strep-PP\_5005.** SDS-PAGE of single step-affinity purified (elution fraction 3) Strep-PP\_5003 from plasmid pTD-NStrepHis (1) and Strep-PP\_5005 (2) and western blot detection with Strep-tactin-AP conjugate (3, 4). M<sub>1</sub> = PageRuler Unstained Protein Ladder (Thermo), M<sub>2</sub> = PageRuler Unstained Broad Range Protein Ladder (Thermo).

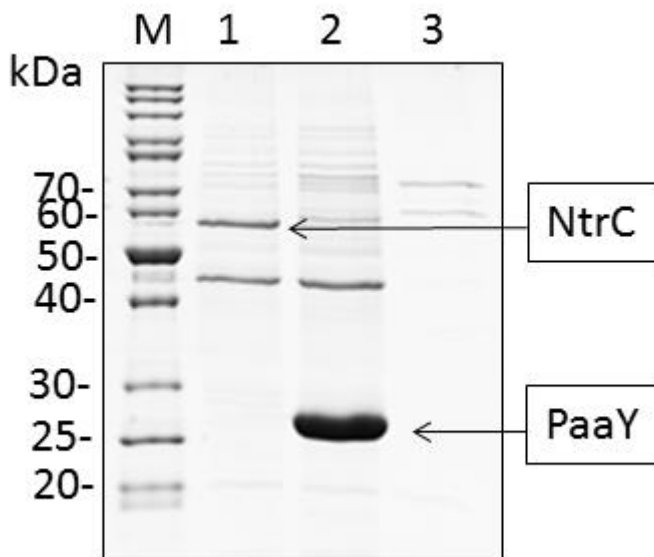

**Figure S7: SDS-PAGE of single step-affinity purified PP\_5048 and PP\_0463.** SDS-PAGE of elution fractions 4 of single step-affinity purified PP\_5048-TwinStrep (NtrC) (1) and PP\_0463-TwinStrep (PaaY) (2) from plasmid pTD-CTwinStrep and empty plasmid control (3) from co-purification experiments with less stringent washing. M= PageRuler Unstained Protein Ladder (Thermo).

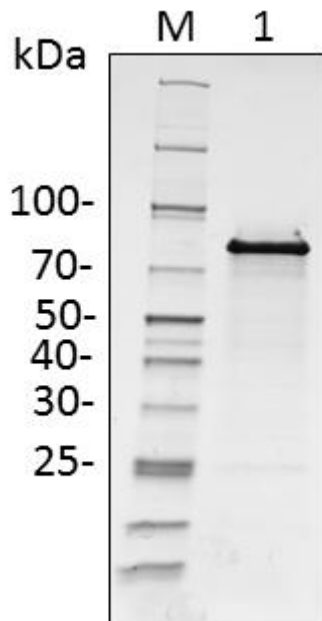

**Figure S8: SDS-PAGE of single step-affinity purified PP\_1656.** SDS-PAGE of single step-affinity purified Strep-PP\_1656 (1) from plasmid pTD-NStrepHis. M= PageRuler Unstained Broad Range Protein Ladder (Thermo).

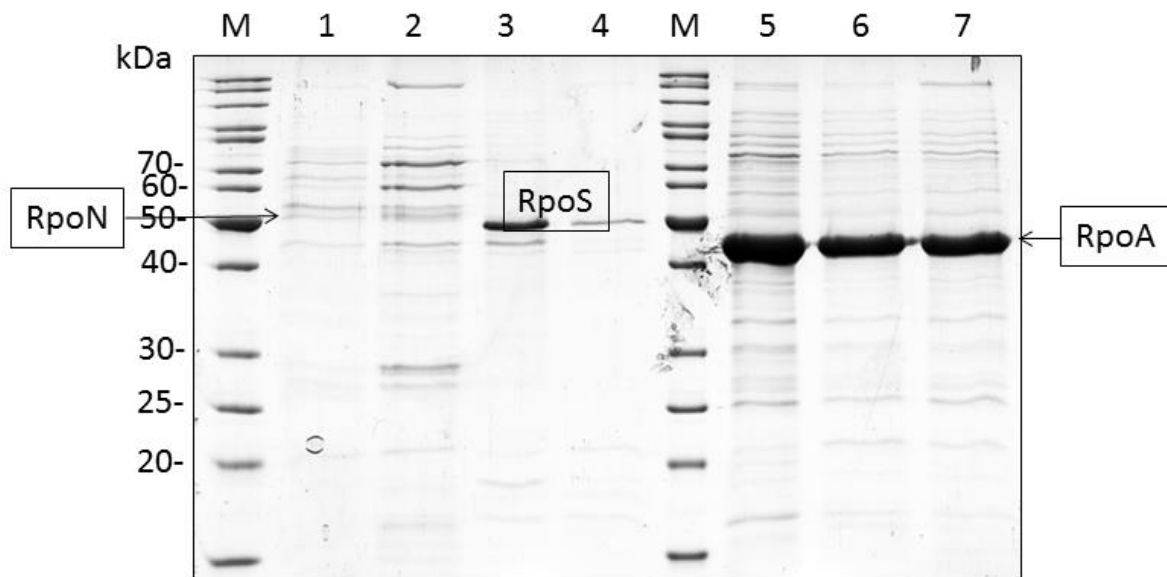

**Figure S9: Reproduction of co-purification band-pattern from independent experiments.** Independent co-purification experiments with low expression and less stringent washing were done to explore the principle potential applicability in complex co-purification mass -spectrometry experiments for the identification native protein interaction partners. RpoN experiment 1 (1), experiment 2 (2) and RpoS experiment 1 (3) experiment 2 (4) from plasmid pTD-NStrepHis; RpoA experiment 1 elution fraction 3 and 4 (5,6) and experiment 2 (7) from plasmid pTD-CTwinStrep. M= PageRuler Unstained Protein Ladder (Thermo).
